# Supplementary material
Source: publisher site journal article supplement (https://www.dovepress.com/article/394607)
Supplement: Supplementary file 1 [file get_supplementary_file.php]

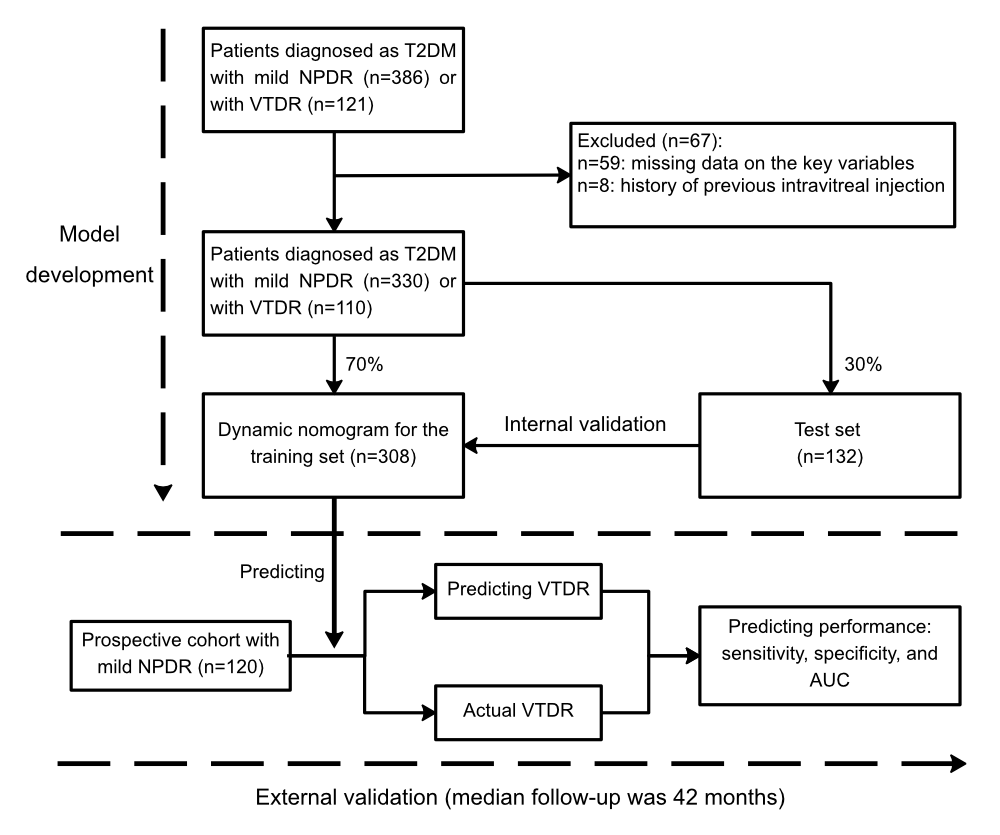


Supplement figure 1. The flow chart of this study. A total of 507 patients diagnosed with T2DM with mild NPDR or VTDR were initially enrolled. After excluding 67 patients for the listed reason, 440 patients were finally enrolled to develop the predicting model. In the prospective cohort, 120 T2DM patients with mild NPDR were enrolled and followed up to external validate the performance of the nomogram.


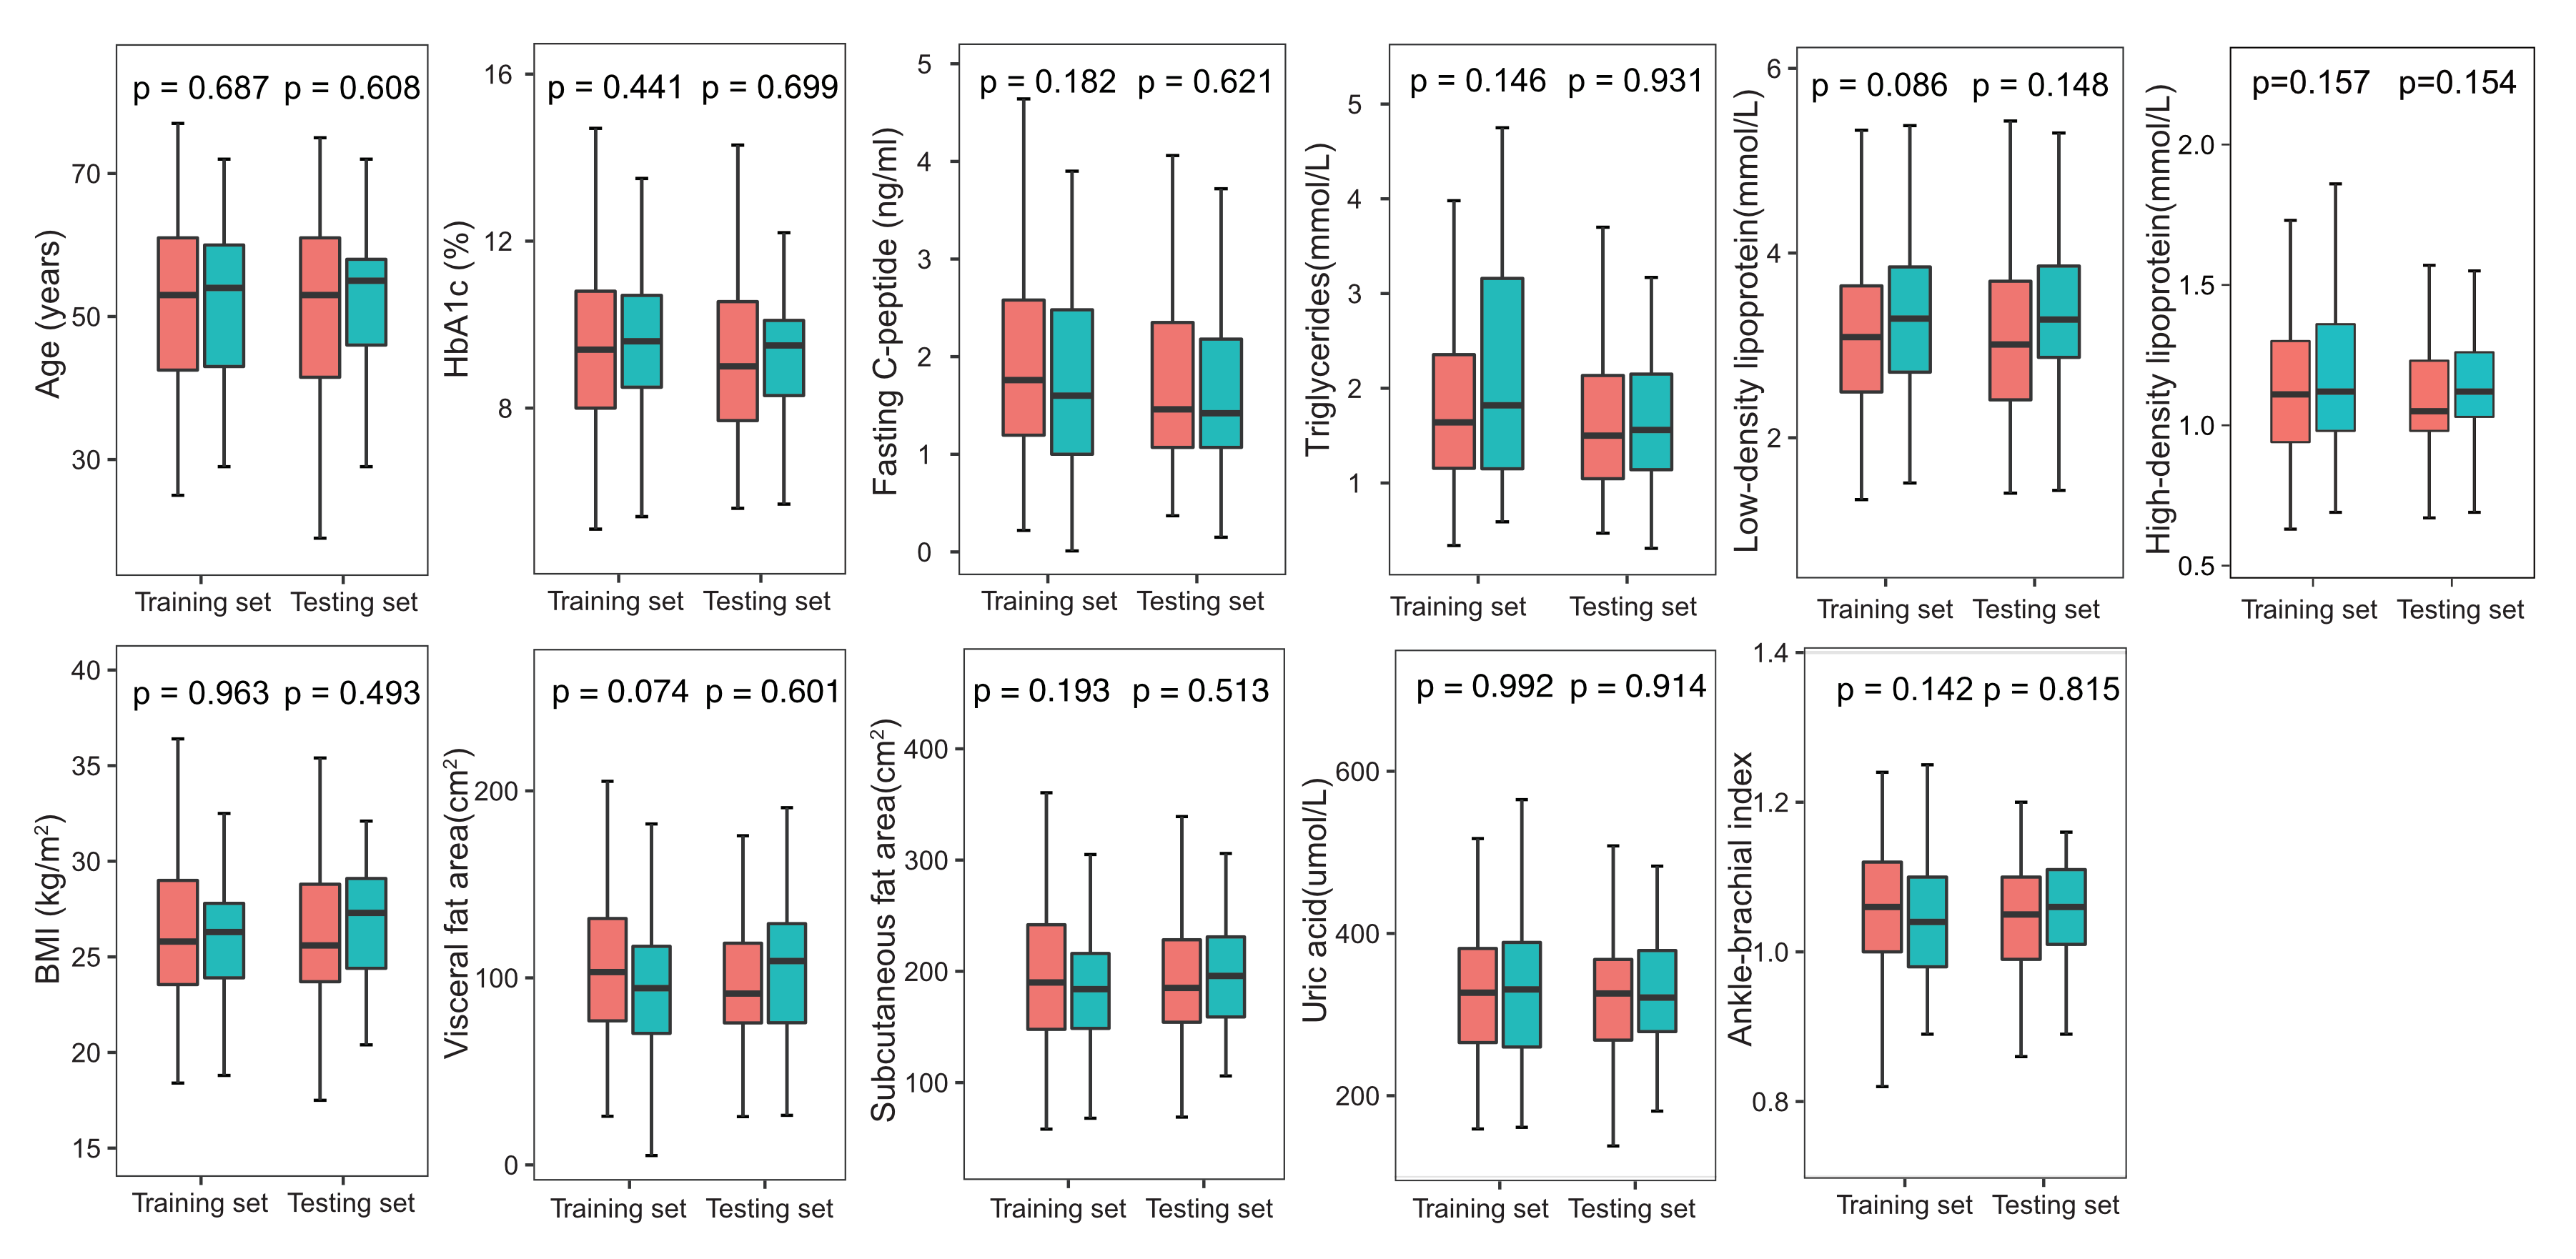


Supplement figure 2. Comparison of clinical and laboratory characteristics in the training and testing sets. There was no significant difference of age, HbA1c, fasting C-peptide, triglyceride, low-density lipoprotein, high-density lipoprotein, BMI, visceral fat area, subcutaneous area, uric acid and ankle-brachial index between the training and testing set.


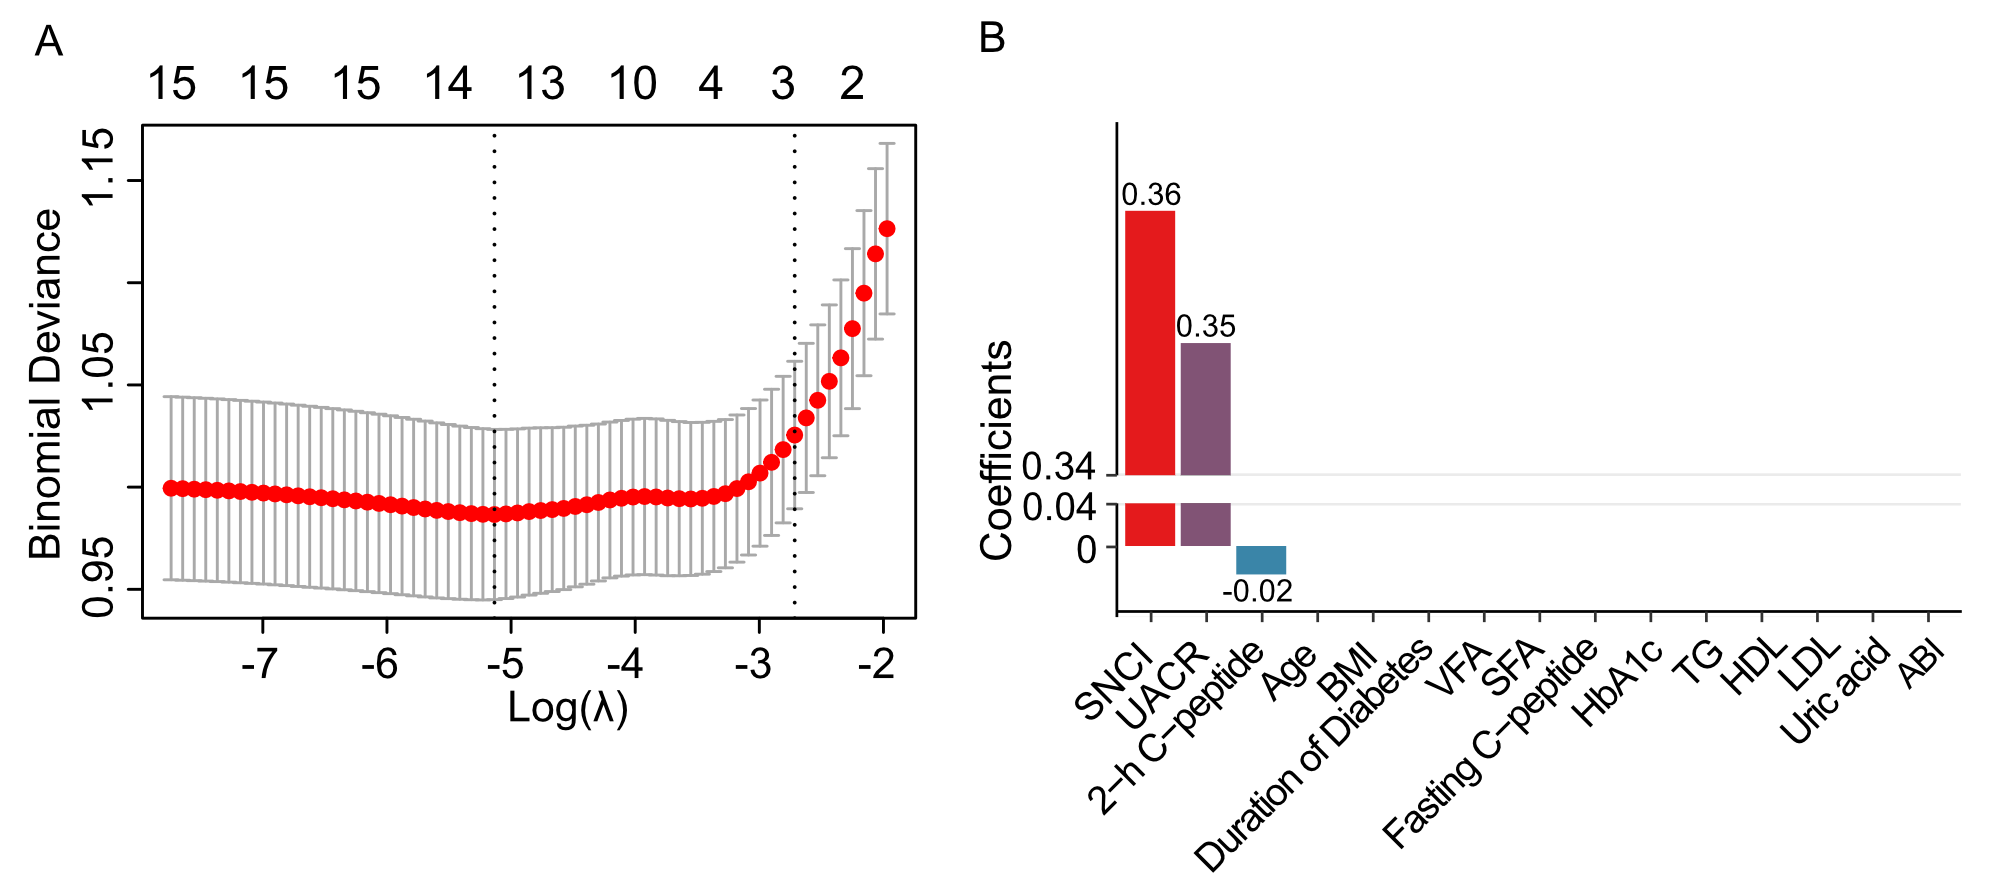


Supplement figure 3. LASSO regression for feature selection. By verifying the optimal parameter (lambda) in the LASSO model, the partial likelihood deviance (binomial deviance) curve was plotted versus log(lambda) and dotted vertical lines were drawn based on 1 standard error criteria (A). The nonzero coefficients were SNCI, UACR, 2-h C-peptide (B).


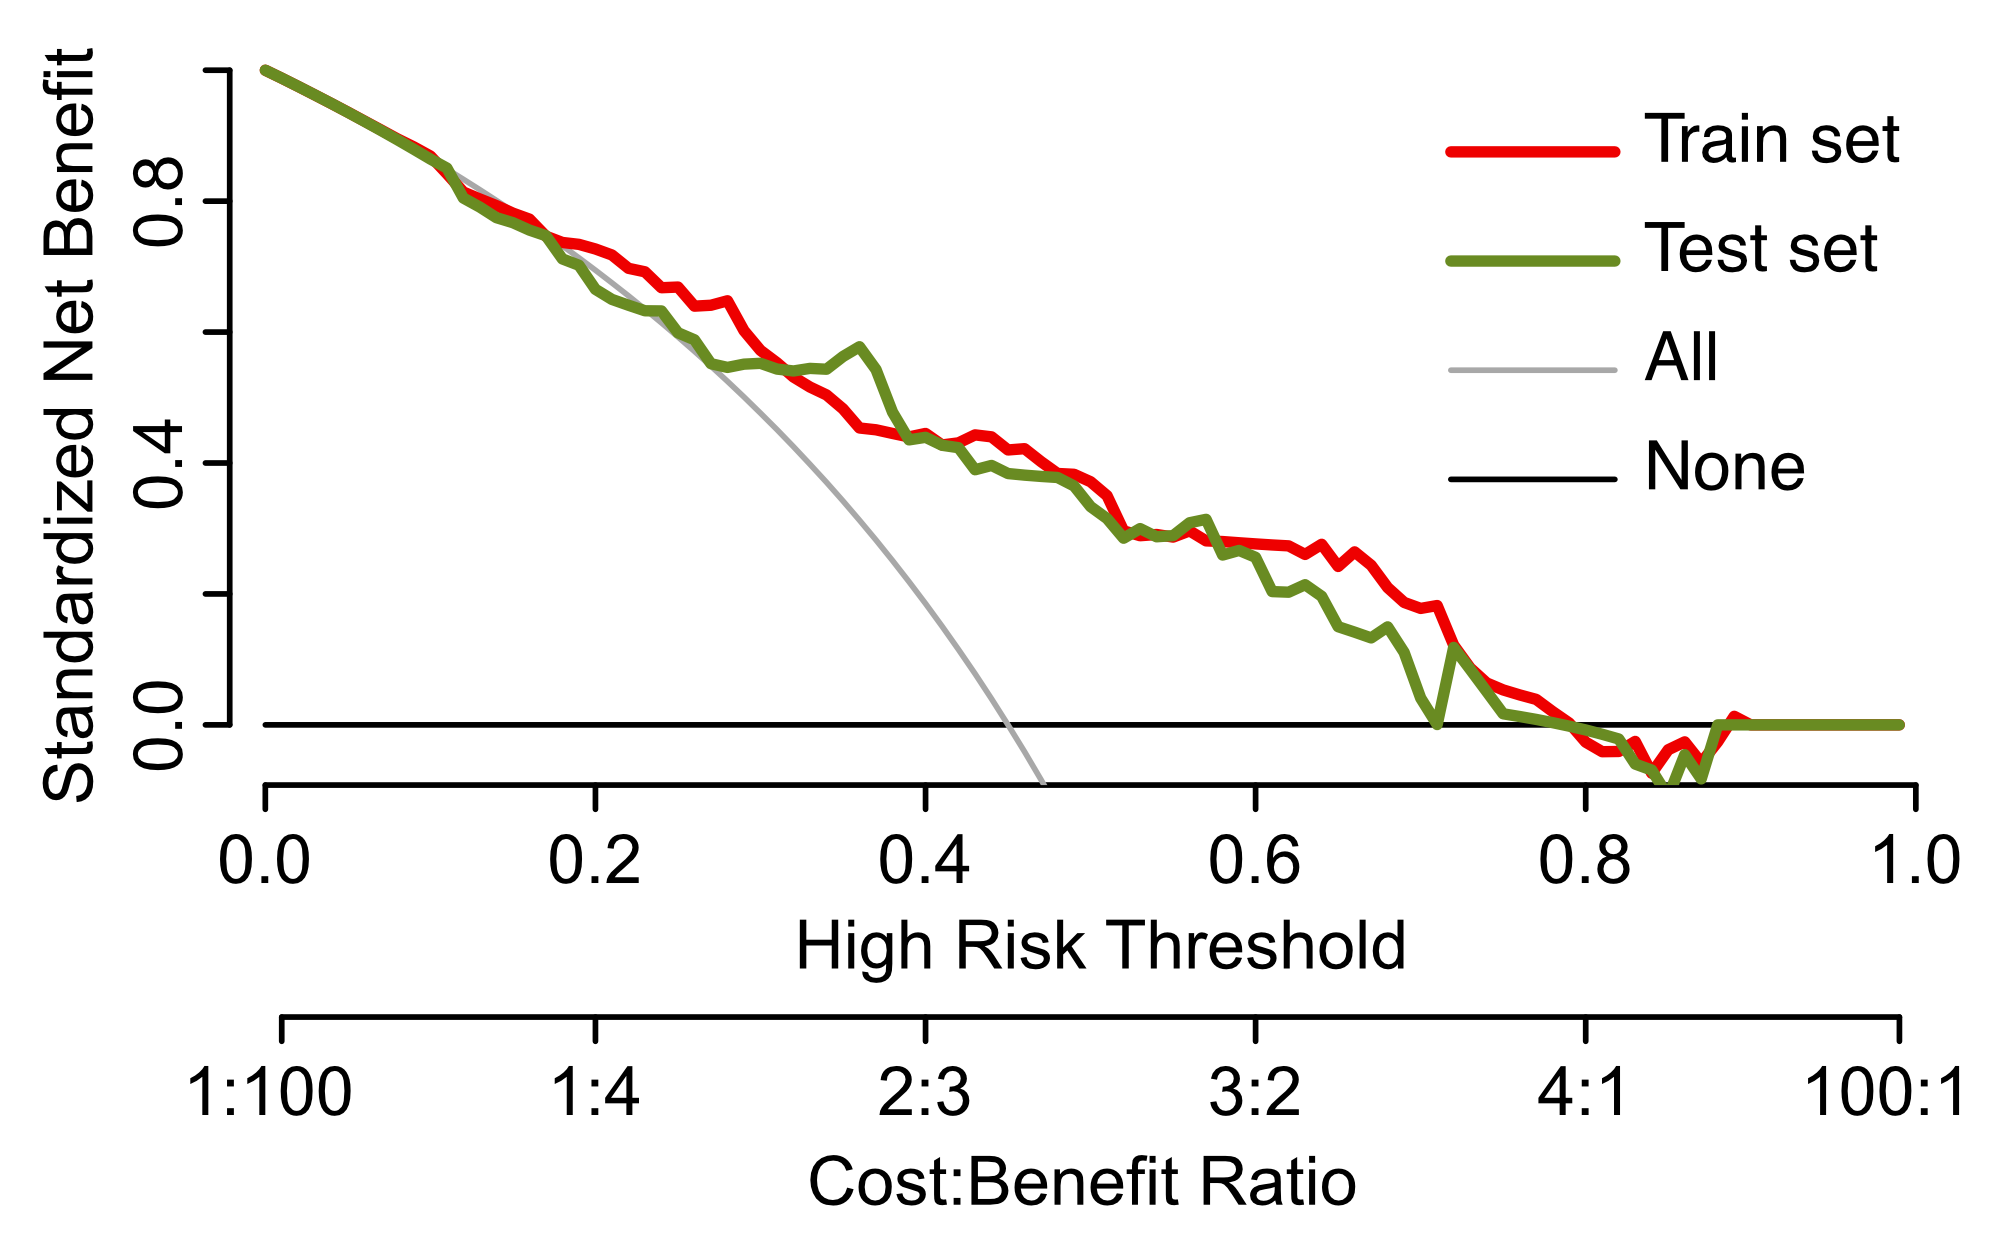


Supplement figure 4. Decision curve analysis of the nomograms for VTDR. The net benefit is greater than either the treat-all-patients scheme or the treat-none scheme when the threshold probability between 25% and 80%.
